# Supplementary material for: The fabrication of mechanically durable and stretchable superhydrophobic PDMS/SiO2 composite film
Source: Royal Society of Chemistry journal article supplement (doi:10.1039/d0ra02029j), 2020-01-01
Supplement: d0ra02029j1.pdf [file d0ra02029j1.pdf]

## Supporting Information

### Fabrication of Mechanically Durable and Stretchable

### Superhydrophobic PDMS/SiO<sub>2</sub> Composite Film

*Chao-Hua Xue, <sup>\*ab</sup> Qian-qian Tian, <sup>a</sup> Shun-Tian Jia, <sup>a</sup> Ling-ling Zhao, <sup>a</sup> Ya-ru Ding, <sup>a</sup> Hui-Gui Li, <sup>a</sup> Qiu-Feng An <sup>c</sup>*

<sup>a</sup> College of Bioresources Chemical and Materials Engineering, Shaanxi University of Science and Technology, Xi'an 710021, China.

<sup>b</sup> National Demonstration Center for Experimental Light Chemistry Engineering Education, Shaanxi University of Science and Technology, Xi'an 710021, China.

<sup>c</sup> College of Chemistry and Chemical Engineering, Shaanxi University of Science and Technology, Xi'an 710021, China.

\* Corresponding author. E-mail: xuechaohua@126.com.

**Figure S1**

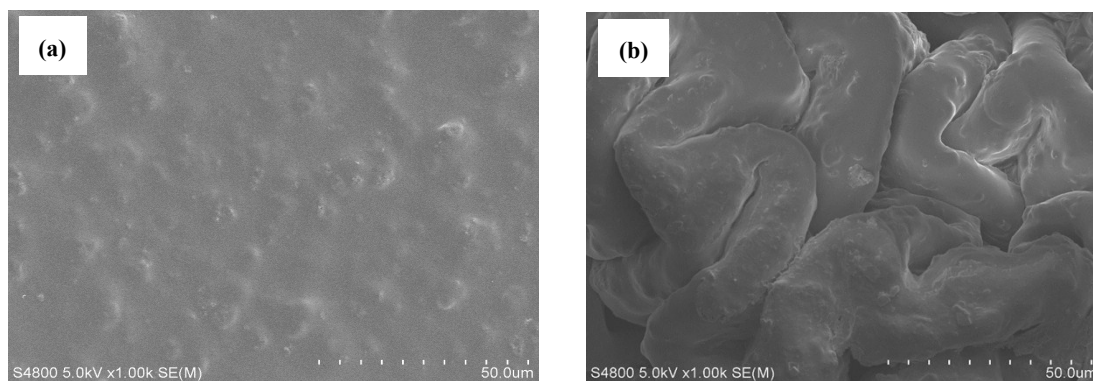

Figure S1 SEM images of shrink film before (a) and after (b) heating.

**Figure S2**

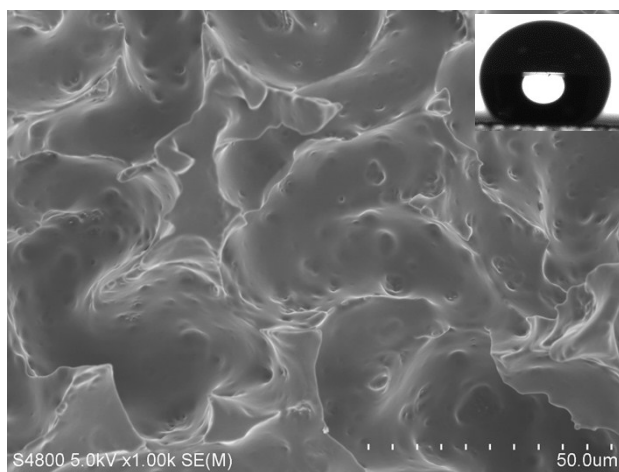

Figure S2 SEM images of superhydrophobic PDMS without spraying nanoparticles.

## Table S1

Table S1 Comparison of the anti-abrasion ability of PDMS/SiO<sub>2</sub> composite film with previously reported works.

| Material                                                       | Applied load | Distance  | Reference |
|----------------------------------------------------------------|--------------|-----------|-----------|
| PFOTS modified TiO <sub>2</sub> coating                        | 0.2 N        | 240 cm    | [1]       |
| SiO <sub>2</sub> +adhesive                                     | 50.0 g       | 1000 cm   | [2]       |
| FAS modified Na <sub>2</sub> MoO <sub>4</sub> and NaCl coating | 700 Pa       | 100 cm    | [3]       |
| PDMS/TA-Al <sup>3+</sup> /PI nanofibrous membrane              | 100 g        | 150 cm    | [4]       |
| BC <sub>6</sub> PSQ/PDMS coating                               | 100 g        | 20 cycles | [5]       |
| BES-25                                                         | 100 g        | 290 cm    | [6]       |
| PDMS/SiO <sub>2</sub> composite film                           | 100 g        | 600 cm    | This work |

## Table S2

Table S2 Comparison of acidic/alkaline resistance of superhydrophobic surfaces reported in literature.

| Material                             | Condition | Time | Reference |
|--------------------------------------|-----------|------|-----------|
| SBS/SiNP/FDTS                        | pH=1/12   | 24 h | [10]      |
| PDMS/TA-M <sup>m+</sup> /PI Membrane | pH=1-14   | 24 h | [4]       |
| NCs Bulk                             | pH=1/13   | 12 h | [7]       |
| APTES-SiO <sub>2</sub> Coating       | pH=2-14   | 40 h | [11]      |
| PDMS/SiO <sub>2</sub> film           | pH=1-13   | 60 h | This work |

## Table S3

Table S3 Comparison of solvent resistance of superhydrophobic surfaces reported in literatures.

| Material                         | Condition                     | Time   | Reference |
|----------------------------------|-------------------------------|--------|-----------|
| PDMS/TA-Mn+/PI Membrane          | Hexane, acetone, toluene      | 24 h   | [4]       |
| APTES-SiO <sub>2</sub> Coating   | acetone, hexane, acetic acid  | 40 h   | [11]      |
| BC <sub>6</sub> PSQ/PDMS Coating | ethanol, acetone, toluene     | 30 min | [5]       |
| PDMS/SiO <sub>2</sub> film       | Hexane, acetone, toluene, DMF | 60 h   | This work |

## Table S4

Table S4 Comparison of UV-irradiation time of superhydrophobic surfaces reported in literatures.

| Material                             | Parameters of UV lamp                     | Time  | Reference |
|--------------------------------------|-------------------------------------------|-------|-----------|
| PDMS/TA-M <sup>n+</sup> /PI Membrane | wave-length =254 nm 2 mW cm <sup>-1</sup> | 20 h  | [4]       |
| NCs Bulk                             | —                                         | 12 h  | [7]       |
| SMP Micropillar Array                | wave-length =365 nm                       | 120 h | [8]       |
| FA-PFDS Coating                      | 40 W, 220 V                               | 70 h  | [9]       |
| PDMS/SiO <sub>2</sub> film           | 30 W, 220 V                               | 150 h | This work |

## **Videos**

**Video S1** The procedure of friction by hand.

**Video S2** The water droplet bounces on the composite superhydrophobic film after friction by hands.

**Video S3** The composite superhydrophobic film could back to normalcy without any damage after stretching with strain of 50%.

**Video S4** Water droplet spreading and recoiling on composite superhydrophobic surface.

**Video S5** Water droplet spreading and recoiling on 50% stretched surface.

**Video S6** Water droplet with higher distance spreading and recoiling on 50% stretched surface.



## Reference

- [1] S. K. Pandit, B. K. Tudu, I. M. Mishra, A. Kumar, *Prog. Org. Coat.*, 2020, 139, 105453.
- [2] C. H. Qi, H. Chen, L. Y. Shen, X. L. Li, Q. Fu, Y. H. Zhang, Y. Y. Sun, Y. Q. Liu, *ACS Appl. Nano Mater.*, 2020, 3, 2047-2057.
- [3] K. N. Fan, Z. J. Jin, Y. Bao, Q. L. Wang, L. Niu, J. Sun, J. L. Song, *Colloids Surf. A*, 2020, 590, 124495
- [4] W. J. Ma, Y. H. Ding, M. J. Zhang, S. T. Gao, Y. S. Li, C. B. Huang, G. D. Fu, *J. Hazard. Mater.*, 2020, 384, 121476.
- [5] L. L. Ni, C. Zhu, S. Z. Zhang, P. Cai, A. Airoudj, L. Vonna, S. H. Garreau, A. Chemtob, *Prog. Org. Coat.*, 2019, 135, 255-262.
- [6] X. Y. Li, S. P. Zhao, W. H. Hu, X. Zhang, L. Pei, Z. Wang, *Appl. Surf. Sci.*, 2019, 481, 374-378.
- [7] C. Chen, M. M. Liu, Y. Y. Hou, L. P. Zhang, M. Li, D. Wang, S. H. Fu, *Chem. Eng. J.*, 2020, 389, 124420.
- [8] X. Bai, Q. Yang, Y. Fang, J. Z. Zhang, J. L. Yong, X. Hou, F. Chen, *Chem. Eng. J.*, 2020, 383, 123143.
- [9] L. X. Liu, Y. B. Hou, Y. Pan, J. J. Liu, W. Wang, J. L. Wang, X. Wang, Y. Hu, Z. Gui, *Prog. Org. Coat.*, 2019, 132, 353-361.
- [10] D. E. Lee, E. Y. Choi, H. J. Yang, A. S.N. Murthy, T. Singh, J. M. Lim, J. Im, *J. Colloid Interf. Sci.*, 2019, 555, 523-540.
- [11] B. Musikavanhu, Z.J. Hu, R. L. Dzapata, Y. C. Xu, P. Christie, D. L. Guo, *Appl. Surf. Sci.*, 2019, 496, 143648.
